# Supplementary material for: Novel Black Seed Polysaccharide Extract-g-Poly (Acrylate) pH-Responsive Hydrogel Nanocomposites for Safe Oral Insulin Delivery: Development, In Vitro, In Vivo and Toxicological Evaluation
Source: MDPI journal article supplement (doi:10.3390/pharmaceutics15010062), 2022-12-25
Supplement: s1 [file s1]

## Supplementary Material

**Table S1.** Correlation coefficient ( $R^2$ ) and release rates of all Ins-BA hydrogel and Ins-Mmt-BA hydrogel NC formulations

| Formulation Codes | Release Model |                          |             |                          |         |                          |                   |                             |       |                |                             |
|-------------------|---------------|--------------------------|-------------|--------------------------|---------|--------------------------|-------------------|-----------------------------|-------|----------------|-----------------------------|
|                   | Zero order    |                          | First order |                          | Higuchi |                          | Korsemeyer-Peppas |                             |       | Hixson-Crowell |                             |
|                   | $R^2$         | $K_0$ (h <sup>-1</sup> ) | $R^2$       | $K_1$ (h <sup>-1</sup> ) | $R^2$   | $k_H$ (h <sup>-1</sup> ) | $R^2$             | $k_{KP}$ (h <sup>-1</sup> ) | $n$   | $R^2$          | $k_{HC}$ (h <sup>-1</sup> ) |
| Ins-BA1           | 0.9565        | 8.169                    | 0.8629      | 0.128                    | 0.7643  | 22.425                   | 0.9752            | 4.280                       | 1.289 | 0.8971         | 0.037                       |
| Ins-BA2           | 0.9493        | 7.056                    | 0.8607      | 0.101                    | 0.7367  | 19.196                   | 0.9897            | 2.423                       | 1.476 | 0.8907         | 0.030                       |
| Ins-BA3           | 0.9413        | 6.664                    | 0.8568      | 0.093                    | 0.7243  | 18.081                   | 0.9889            | 2.011                       | 1.533 | 0.8853         | 0.028                       |
| Ins-BA4           | 0.9558        | 7.200                    | 0.8681      | 0.105                    | 0.7475  | 19.636                   | 0.9901            | 2.758                       | 1.428 | 0.8983         | 0.031                       |
| Ins-BA5           | 0.9601        | 7.480                    | 0.8713      | 0.111                    | 0.7570  | 20.452                   | 0.9883            | 3.220                       | 1.377 | 0.9024         | 0.033                       |
| Ins-BA6           | 0.9613        | 8.519                    | 0.8647      | 0.137                    | 0.7746  | 23.443                   | 0.9761            | 4.865                       | 1.251 | 0.9003         | 0.040                       |
| Ins-Mmt-BA1       | 0.9929        | 3.955                    | 0.9369      | 0.063                    | 0.8432  | 15.455                   | 0.9934            | 3.544                       | 1.038 | 0.9628         | 0.018                       |
| Ins-Mmt-BA2       | 0.9895        | 3.702                    | 0.9363      | 0.057                    | 0.8277  | 14.403                   | 0.9915            | 2.947                       | 1.078 | 0.9603         | 0.017                       |
| Ins-Mmt-BA3       | 0.9857        | 3.514                    | 0.9326      | 0.052                    | 0.8128  | 13.615                   | 0.9900            | 2.474                       | 1.120 | 0.9556         | 0.015                       |
| Ins-Mmt-BA4       | 0.9914        | 3.776                    | 0.9396      | 0.059                    | 0.8359  | 14.723                   | 0.9924            | 3.212                       | 1.056 | 0.9636         | 0.017                       |
| Ins-Mmt-BA5       | 0.9927        | 3.873                    | 0.9388      | 0.061                    | 0.8407  | 15.121                   | 0.9933            | 3.400                       | 1.045 | 0.9637         | 0.018                       |
| Ins-Mmt-BA6       | 0.9936        | 4.072                    | 0.9386      | 0.067                    | 0.8527  | 15.962                   | 0.9936            | 3.961                       | 1.010 | 0.9637         | 0.018                       |
